# Supplementary material for: Structural basis for human ZBTB7A action at the fetal globin promoter
Source: PubMed Central journal article supplement — Cell Rep. Author manuscript; Available in PMC 2021 Oct 28. (PMC8553545; doi:10.1016/j.celrep.2021.109759), 2021-09-28
Supplement: NIHMS1750482-supplement-1.pdf [file NIHMS1750482-supplement-1.pdf]

**Cell Reports, Volume 36**

**Supplemental information**

**Structural basis for human ZBTB7A action  
at the fetal globin promoter**

**Yang Yang, Ren Ren, Lana C. Ly, John R. Horton, Fudong Li, Kate G.R. Quinlan, Merlin Crossley, Yunyu Shi, and Xiaodong Cheng**

## Supplementary Information

### Structural basis for human ZBTB7A action at the fetal globin promoter

Yang Yang<sup>1,2,5</sup>, Ren Ren<sup>3,5</sup>, Lana C. Ly<sup>4,5</sup>, John R. Horton<sup>3</sup>, Fudong Li<sup>2</sup>, Kate G.R. Quinlan<sup>4</sup>, Merlin Crossley<sup>4,\*</sup>, Yunyu Shi<sup>1,2,\*</sup>, Xiaodong Cheng<sup>3,6,\*</sup>

<sup>1</sup>Hefei National Laboratory for Physical Sciences at Microscale, School of Life Sciences, Division of Life Sciences and Medicine, University of Science and Technology of China, Hefei, Anhui 230026, China

<sup>2</sup>Ministry of Education Key Laboratory for Membraneless Organelles and Cellular Dynamics, University of Science and Technology of China, Hefei, China

<sup>3</sup>Department of Epigenetics and Molecular Carcinogenesis, University of Texas MD Anderson Cancer Center, Houston, TX 77030, USA

<sup>4</sup>School of Biotechnology and Biomolecular Sciences, University of New South Wales, Sydney, 2052, Australia

<sup>5</sup>These authors contributed equally

<sup>6</sup>Lead contact

\*Correspondence: m.crossley@unsw.edu.au (M.C.), yyshi@ustc.edu.cn (Y.S.); xcheng5@mdanderson.org (X.C.)

Email addresses of all authors:

YY (swgcy@mail.ustc.edu.cn); RR (RRen1@mdanderson.org); LL (lana.ly@unsw.edu.au); JRH (JRHorton@mdanderson.org); LFD (lifudong@ustc.edu.cn); KQ (kate.quinlan@unsw.edu.au); MC (m.crossley@unsw.edu.au); YS (yyshi@ustc.edu.cn); XC (xcheng5@mdanderson.org)

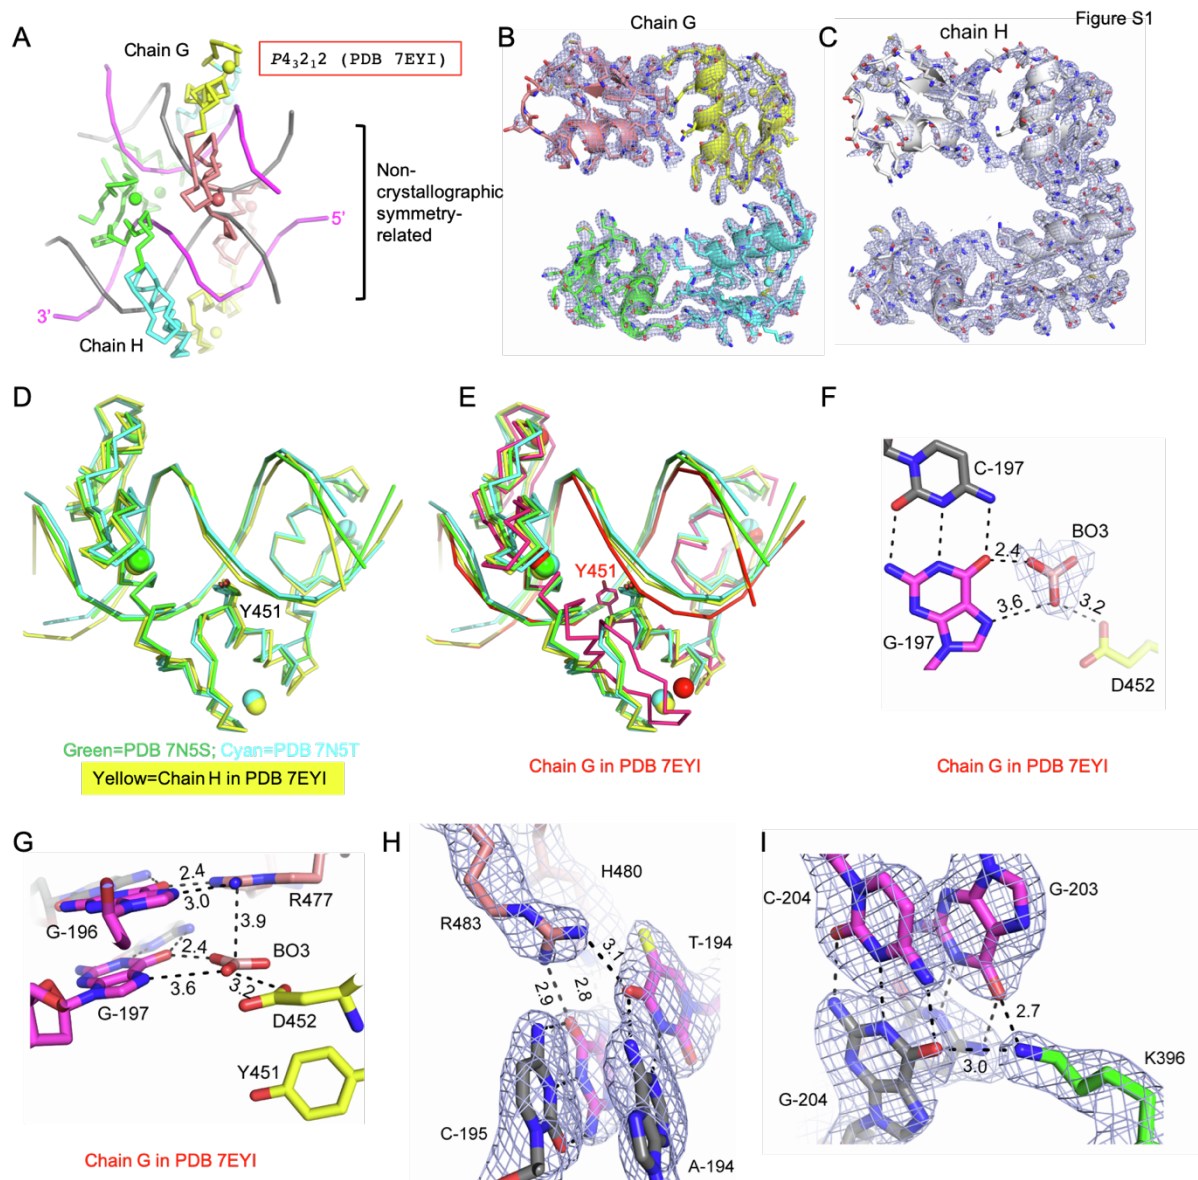

**Figure S1. Related to Figure 3. Additional structural information in  $P4_32_12$  space group (PDB 7EYI).** (A) Two complexes (chains G and H) in the asymmetric unit. (B-C) 2Fo-Fc composite omit electron density maps (contoured at  $1\sigma$  level) for chain G (panel D) and chain H (panel E) of the two complexes. The electron densities of ZF4 are less ordered than that of ZF1-3, and we did not observe electron densities of the C-terminus residues (491-506) though used in the crystallization. (D) Superimposition of three highly similar complexes as indicated. (E) Chain G in PDB 7EYI has the largest deviation (particularly ZF3) from the other three structures. (F-G) A boric acid binds in the DNA-protein interface of complex G in PDB 7EYI. An omit 2Fo-Fc electron density in light blue mesh (contoured at  $1.0\sigma$  level above the mean) is shown for the bound boric acid. (H-I) The corresponding 2Fo-Fc omit map (contoured at  $1.0\sigma$  with carve of  $2.0\text{\AA}$ ) of (H) R483 bridging between two base pairs (-195 and -194) and (I) K396 bridging between two base pairs (-204 and -203).



**Table S1. Related to Figures 2 and 3. X-ray data collection and refinement statistics**

| ZBTB7A (PDB)                                        | 7EYI                                     | 7N5S                             | 7N5T                             |
|-----------------------------------------------------|------------------------------------------|----------------------------------|----------------------------------|
| DNA (5' – 3')<br>(3' – 5')                          | ATAGGGCCCTTCCCAAC<br>ATCCCGGGGAAGGGTTGT  | GGGGCCCTTCCCA<br>CCCGGGGAAGGGGTC | AGGCCCTTCCCAAC<br>CCGGGAAGGGTGT  |
| Synchrotron                                         | BL19U1                                   | SERCAT (22-ID)                   | SERCAT (22-ID)                   |
| Date collected                                      | 2020-12-05                               | 2020-12-14                       | 2020-12-14                       |
| Wavelength (Å)                                      | 0.979                                    | 1.0                              | 1.0                              |
| Space group                                         | <i>P</i> 4 <sub>3</sub> 2 <sub>1</sub> 2 | <i>P</i> 2                       | <i>P</i> 222 <sub>1</sub>        |
| Cell dimensions (Å)                                 | 67.4, 67.4, 228.7                        | 46.9 37.0 74.3                   | 35.5, 36.4, 176.4                |
| $\alpha$ , $\beta$ , $\gamma$ (°)                   | 90, 90, 90                               | 90, 100, 90                      | 90, 90, 90                       |
| Resolution (Å)                                      | 40.00–2.40 (2.44–2.40)                   | 36.32–2.85 (2.95–2.85)           | 36.37–2.89 (2.99–2.89)           |
| <i>R</i> <sub>merge</sub>                           | 0.094 (1.38)                             | 0.097 (1.67)                     | 0.222 (1.27)                     |
| <i>R</i> <sub>pim</sub>                             | 0.019 (0.291)                            | 0.030 (0.701)                    | 0.033 (0.736)                    |
| <i>CC</i> <sub>1/2</sub> , <i>CC</i> *              | 0.994 (0.799)                            | 0.610 (0.871)                    | 0.873 (0.966)                    |
| <i>I</i> / $\sigma$ <i>I</i>                        | 36.9 (2.3)                               | 18.8 (1.4)                       | 24.7 (2.1)                       |
| Completeness (%)                                    | 99.1 (98.8)                              | 92.6 (66.0)                      | 99.3 (97.0)                      |
| Redundancy                                          | 25.2 (23.1)                              | 10.3 (4.1)                       | 41.3 (17.4)                      |
| Observed reflections                                | 539,565                                  | 56,976                           | 228,897                          |
| Unique reflections                                  | 21,433 (1037)                            | 5,550 (384)                      | 5,536 (542)                      |
| Wilson B-factor (Å <sup>2</sup> )                   | 39                                       | 96                               | 77                               |
| Mean FOM (SAD)                                      | 0.48 at 2.4 Å                            |                                  | (severe anisotropy) <sup>1</sup> |
| Density modification                                | 0.51 at 2.4 Å                            |                                  |                                  |
| <b>Refinement (F&gt;0)</b>                          |                                          |                                  |                                  |
| No. reflections (overall)                           | 19,866                                   | 5,528                            | 5,418                            |
| No. reflections (test)                              | 1,029                                    | 251                              | 269                              |
| <i>R</i> <sub>work</sub> / <i>R</i> <sub>free</sub> | 0.222 / 0.267                            | 0.226 / 0.272                    | 0.247 / 0.310                    |
| Number of atoms                                     |                                          |                                  |                                  |
| Protein                                             | 1816                                     | 833                              | 837                              |
| DNA                                                 | 1394                                     | 577                              | 592                              |
| ZN                                                  | 8                                        | 4                                | 4                                |
| Water                                               | 29                                       | -                                | -                                |
| Boric acid                                          | 4                                        | -                                | -                                |
| B factors (Å <sup>2</sup> )                         |                                          |                                  |                                  |
| Protein                                             | 47.1                                     | 114                              | 116                              |
| DNA                                                 | 50.7                                     | 113                              | 106                              |
| ZN                                                  | 48.7                                     | 115                              | 125                              |
| Water                                               | 31.3                                     | -                                | -                                |
| Boric acid                                          | 32.4                                     | -                                | -                                |
| R.m.s. deviations                                   |                                          |                                  |                                  |
| Bond lengths (Å)                                    | 0.003                                    | 0.003                            | 0.003                            |
| Bond angles (°)                                     | 0.5                                      | 0.4                              | 0.6                              |
| Ramachandran plot (%)                               |                                          |                                  |                                  |
| Favored                                             | 97.3                                     | 95.4                             | 95.4                             |
| Allowed                                             | 2.7                                      | 4.6                              | 4.6                              |

<sup>1</sup> The anisotropic Wilson B tensor for 7N5T:

```
111.39  0.00  0.00
  0.00 139.88 -0.00
  0.00 -0.00 39.51
```

The values 111.39, 139.88, 39.51 relate to the principal axes of an ellipse. If numbers are about the same, there's no anisotropy or isotropic. If one number (axis) differs significantly from the others, there is a severe ellipse.)

**Table S2. Related to Figures 4B and 4C.** Summary of ITC data.

| ZBTB7A              | DNA    | $\Delta H$<br>(kJ/mol) | $-T\Delta S$<br>(kJ/mol) | $\Delta G$<br>(kJ/mol) | N    | $K_D$ ( $\mu M$ ) |
|---------------------|--------|------------------------|--------------------------|------------------------|------|-------------------|
| <b>@150 mM NaCl</b> |        |                        |                          |                        |      |                   |
|                     | WT     | -13.7 $\pm$ 0.2        | 5.08                     | -8.66                  | 1.10 | 0.35 $\pm$ 0.05   |
|                     | C-194A | -13.3 $\pm$ 0.2        | 4.84                     | -8.50                  | 1.09 | 0.47 $\pm$ 0.07   |
| <b>@300 mM NaCl</b> |        |                        |                          |                        |      |                   |
|                     | WT     | -11.1 $\pm$ 0.2        | 2.98                     | -8.10                  | 1.00 | 0.92 $\pm$ 0.09   |
|                     | G-204A | -13.2 $\pm$ 0.5        | 6.00                     | -7.20                  | 1.25 | 4.3 $\pm$ 0.5     |
|                     | C-203G | -11.3 $\pm$ 0.6        | 4.55                     | -6.71                  | 1.12 | 10 $\pm$ 1        |
|                     | T-198C | -13.7 $\pm$ 0.4        | 6.52                     | -7.19                  | 0.94 | 4.4 $\pm$ 0.3     |
|                     | C-197T | -9.6 $\pm$ 0.4         | 2.70                     | -6.93                  | 1.11 | 6.8 $\pm$ 0.7     |
|                     | C-196T | -12.0 $\pm$ 0.5        | 5.06                     | -6.90                  | 0.99 | 7.2 $\pm$ 0.7     |
|                     | C-195G | -11.0 $\pm$ 0.7        | 4.28                     | -6.76                  | 0.97 | 9 $\pm$ 1         |

No binding was detected for C-202G, C-202T and C-201T mutations.

$K_D$ , N,  $\Delta H$ ,  $-T\Delta S$ ,  $\Delta G$  stand for dissociation constant, stoichiometry, enthalpy, entropy and Gibbs energy, respectively. Each  $K_D$  value is presented as fitted value  $\pm$  error.

**Table S3. Related to Key Resources Table.** Oligonucleotides used in this paper.

| Oligonucleotides                                         | Application         |
|----------------------------------------------------------|---------------------|
| 5' -GGCCCCTTCCCCAC -3'<br>3' -CCGGGGAAGGGGTGT-5' -FAM    | FP binding          |
| 5' -AGGCCCTTCCCCAC-3'<br>3' - CCGGGGAAGGGGTGT-5'         | Crystallization     |
| 5' -GGGGCCCCTTCCCCA -3'<br>3' - CCCGGGGAAGGGGTC-5'       | Crystallization     |
| 5' -ATAGGGCCCCTTCCCCAAC -3'<br>3' - ATCCCGGGGAAGGGTGT-5' | Crystallization     |
| 5' -GGCCCCTTCCCCA-3'<br>3' -CCGGGGAAGGGGT-5'             | IDT binding<br>(WT) |
| 5' -GACCCCTTCCCCA-3'<br>3' -CTGGGGAAGGGGT-5'             | IDT<br>(G-204A)     |
| 5' -GGGCCCTTCCCCA-3'<br>3' -CCCGGGAAGGGGT-5'             | IDT<br>(C-203G)     |
| 5' -GGCGCCTTCCCCA-3'<br>3' -CCGCGGAAGGGGT-5'             | IDT<br>(C-202G)     |
| 5' -GGCTCCTTCCCCA-3'<br>3' -CCGAGGAAGGGGT-5'             | IDT<br>(C-202T)     |
| 5' -GGCCTCTTCCCCA-3'<br>3' -CCGGAAGAAGGGGT-5'            | IDT<br>(C-201T)     |
| 5' -GGCCCCTCCCCA-3'<br>3' -CCGGGGAAGGGGT-5'              | IDT<br>(T-198C)     |
| 5' -GGCCCCTTCCCCA-3'<br>3' -CCGGGGAAGGGGT-5'             | IDT<br>(C-197T)     |
| 5' -GGCCCCTTCTCCA-3'<br>3' -CCGGGGAAGAGGT-5'             | IDT<br>(C-196T)     |
| 5' -GGCCCCTTCCGCA-3'<br>3' -CCGGGGAAGGCGT-5'             | IDT<br>(C-195G)     |
